# Supplementary material for: Behavior of Hybrid Reinforced Concrete Bridge Decks under Static and Fatigue Loading
Source: MDPI journal article supplement (doi:10.3390/polym14235153), 2022-11-26
Supplement: s1 [file s1]

## Flexural Analysis of GFRP Decks with Fibers: Hybrid 1 and Hybrid 2

**Scope:** Analyze the Flexural Capacity of the Fiber Decks

**Calculated by:** Jared McRory

### Assumptions and Analysis Criteria:

Slab Thickness:  $t_{slab} := 203 \text{ mm}$   $c_c := 38.1 \text{ mm}$  (Clear Cover)

Width of Slab:  $b_{slab} := 1219 \text{ mm}$

Reinforcement:  $S_{bar} := 152 \text{ mm}$   $d_{bar} := 19 \text{ mm}$   $A_{bar} := \frac{\pi \cdot d_{bar}^2}{4} = 283.529 \text{ mm}^2$

$F_{ult} := 825 \text{ MPa}$   $E_f := 56.5 \text{ GPa}$   $A_f := 6 \cdot A_{bar} = (1.701 \cdot 10^3) \text{ mm}^2$

Concrete:  $f'_c := 43.7 \text{ MPa}$

$$\beta_1 := 0.85 - \left( \frac{f'_c - 4000 \text{ psi}}{1000 \text{ psi}} \right) \cdot 0.05 = 0.733 \quad \epsilon_{cu} := 0.003$$

Fibers:  $f_{ravg} := \frac{1.122}{3} \text{ MPa} = 0.374 \text{ MPa}$

$$d_2 := t_{slab} - \left( c_c + \frac{d_{bar}}{2} \right) = 155.4 \text{ mm}$$

$$\rho_f := \frac{A_f}{b_{slab} \cdot d_2} = 0.00898 \quad \text{ACI 440.1R, Eq. 7.2.1a}$$

$$\rho_{fb} := 0.85 \cdot \beta_1 \cdot \frac{f'_c}{F_{ult}} \cdot \left( \frac{E_f \cdot 0.003}{E_f \cdot 0.003 + F_{ult}} \right) = 0.00563 \quad \text{ACI 440.1R, Eq. 7.2.1b}$$

$\rho_f > \rho_{fb}$  Therefore, Compression Controlled.

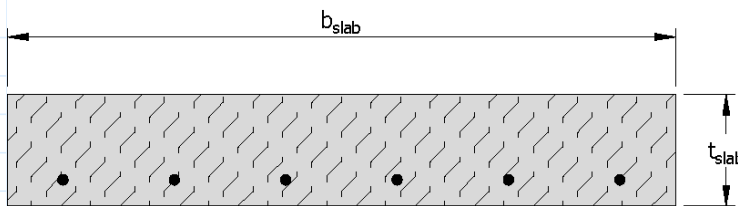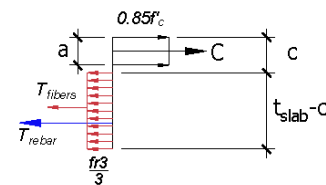

Guess a value for c:  $c := 75 \cdot \text{mm}$

$$c := \text{root} \left( A_f \cdot E_f \cdot \epsilon_{cu} \cdot \left( \frac{d_2 - c}{c} \right) - 0.85 \cdot f'_c \cdot b_{slab} \cdot \beta_1 \cdot c + f_{ravg} \cdot (t_{slab} - c) \cdot b_{slab}, c \right) = 33.698 \text{ mm}$$

$$a := c \cdot \beta_1 = 24.704 \text{ mm}$$

$$M_n := d_2 \cdot A_f \cdot E_f \cdot \epsilon_{cu} \cdot \left( \frac{d_2 - c}{c} \right) - 0.85 \cdot f'_c \cdot b_{slab} \cdot \beta_1 \cdot c \cdot 0.5 \cdot a + f_{ravg} \cdot (t_{slab} - c) \cdot b_{slab} \cdot \left( t_{slab} - \frac{(t_{slab} - c)}{2} \right) = 157.15 \text{ kN} \cdot \text{m}$$

## Flexural Analysis of GFRP Decks with Fibers: Hybrid 3, Hybrid 2 million

**Scope:** Analyze the Flexural Capacity of the Fiber Decks

**Calculated by:** Jared McRory

### Assumptions and Analysis Criteria:

Slab Thickness:  $t_{slab} := 203 \text{ mm}$   $c_c := 38.1 \text{ mm}$  (Clear Cover)

Width of Slab:  $b_{slab} := 1219 \text{ mm}$

Reinforcement:  $S_{bar} := 152 \text{ mm}$   $d_{bar} := 19 \text{ mm}$   $A_{bar} := \frac{\pi \cdot d_{bar}^2}{4} = 283.529 \text{ mm}^2$

$F_{ult} := 825 \text{ MPa}$   $E_f := 56.5 \text{ GPa}$   $A_f := 6 \cdot A_{bar} = (1.701 \cdot 10^3) \text{ mm}^2$

Concrete:  $f'_c := 40.5 \text{ MPa}$

$$\beta_1 := 0.85 - \left( \frac{f'_c - 4000 \text{ psi}}{1000 \text{ psi}} \right) \cdot 0.05 = 0.756 \quad \varepsilon_{cu} := 0.003$$

Fibers:  $f_{ravg} := \frac{1.40}{3} \text{ MPa} = 0.467 \text{ MPa}$

$$d_2 := t_{slab} - \left( c_c + \frac{d_{bar}}{2} \right) = 155.4 \text{ mm}$$

$$\rho_f := \frac{A_f}{b_{slab} \cdot d_2} = 0.00898 \quad \text{ACI 440.1R, Eq. 7.2.1a}$$

$$\rho_{fb} := 0.85 \cdot \beta_1 \cdot \frac{f'_c}{F_{ult}} \cdot \left( \frac{E_f \cdot 0.003}{E_f \cdot 0.003 + F_{ult}} \right) = 0.00538 \quad \text{ACI 440.1R, Eq. 7.2.1b}$$

$\rho_f > \rho_{fb}$  Therefore, Compression Controlled.

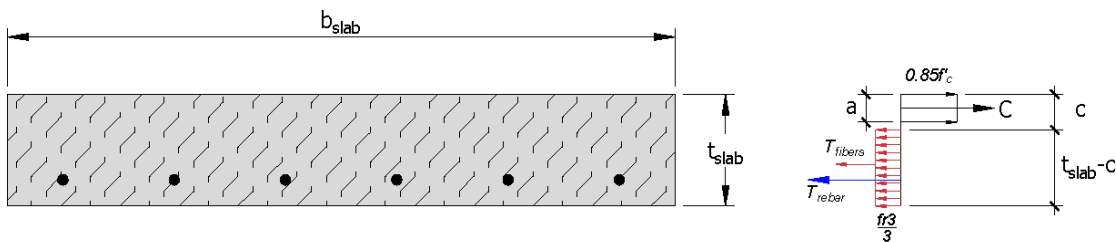

Guess a value for c:  $c := 25 \cdot 3 \cdot \text{mm}$

$$c := \text{root} \left( A_f \cdot E_f \cdot \varepsilon_{cu} \cdot \left( \frac{d_2 - c}{c} \right) - 0.85 \cdot f'_c \cdot b_{slab} \cdot \beta_1 \cdot c + f_{ravg} \cdot (t_{slab} - c) \cdot b_{slab}, c \right) = 34.663 \text{ mm}$$

$$a := c \cdot \beta_1 = 26.216 \text{ mm}$$

$$M_n := d_2 \cdot A_f \cdot E_f \cdot \varepsilon_{cu} \cdot \left( \frac{d_2 - c}{c} \right) - 0.85 \cdot f'_c \cdot b_{slab} \cdot \beta_1 \cdot c \cdot 0.5 \cdot a + f_{ravg} \cdot (t_{slab} - c) \cdot b_{slab} \cdot \left( t_{slab} - \frac{(t_{slab} - c)}{2} \right) = 153.037 \text{ kN} \cdot \text{m}$$

## Flexural Analysis of GFRP Decks with Fibers: Hybrid 1 million

**Scope:** Analyze the Flexural Capacity of the Fiber Decks

**Calculated by:** Jared McRory

### Assumptions and Analysis Criteria:

Slab Thickness:  $t_{slab} := 203 \text{ mm}$   $c_c := 38.1 \text{ mm}$  (Clear Cover)

Width of Slab:  $b_{slab} := 1219 \text{ mm}$

Reinforcement:  $S_{bar} := 152 \text{ mm}$   $d_{bar} := 19 \text{ mm}$   $A_{bar} := \frac{\pi \cdot d_{bar}^2}{4} = 283.529 \text{ mm}^2$

$F_{ult} := 825 \text{ MPa}$   $E_f := 56.5 \text{ GPa}$   $A_f := 6 \cdot A_{bar} = (1.701 \cdot 10^3) \text{ mm}^2$

Concrete:  $f'_c := 48.5 \text{ MPa}$

$$\beta_1 := 0.85 - \left( \frac{f'_c - 4000 \text{ psi}}{1000 \text{ psi}} \right) \cdot 0.05 = 0.698 \quad \epsilon_{cu} := 0.003$$

Fibers:  $f_{ravg} := \frac{1.12}{3} \text{ MPa} = 0.373 \text{ MPa}$

$$d_2 := t_{slab} - \left( c_c + \frac{d_{bar}}{2} \right) = 155.4 \text{ mm}$$

$$\rho_f := \frac{A_f}{b_{slab} \cdot d_2} = 0.00898 \quad \text{ACI 440.1R, Eq. 7.2.1a}$$

$$\rho_{fb} := 0.85 \cdot \beta_1 \cdot \frac{f'_c}{F_{ult}} \cdot \left( \frac{E_f \cdot 0.003}{E_f \cdot 0.003 + F_{ult}} \right) = 0.00595 \quad \text{ACI 440.1R, Eq. 7.2.1b}$$

$\rho_f > \rho_{fb}$  Therefore, Compression Controlled.

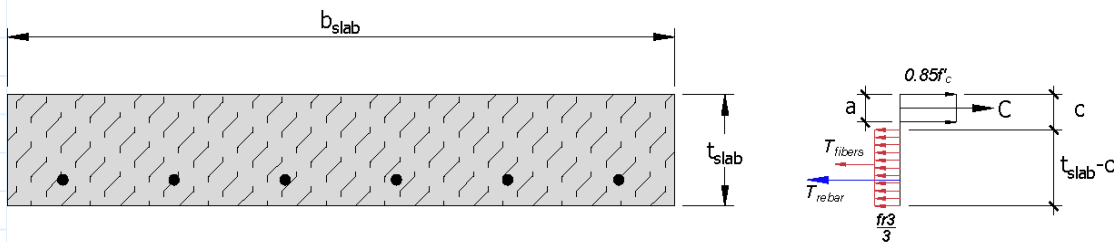

Guess a value for c:  $c := 25 \cdot 3 \cdot \text{mm}$

$$c := \text{root} \left( A_f \cdot E_f \cdot \epsilon_{cu} \cdot \left( \frac{d_2 - c}{c} \right) - 0.85 \cdot f'_c \cdot b_{slab} \cdot \beta_1 \cdot c + f_{ravg} \cdot (t_{slab} - c) \cdot b_{slab}, c \right) = 32.855 \text{ mm}$$

$$a := c \cdot \beta_1 = 22.942 \text{ mm}$$

$$M_n := d_2 \cdot A_f \cdot E_f \cdot \epsilon_{cu} \cdot \left( \frac{d_2 - c}{c} \right) - 0.85 \cdot f'_c \cdot b_{slab} \cdot \beta_1 \cdot c \cdot 0.5 \cdot a + f_{ravg} \cdot (t_{slab} - c) \cdot b_{slab} \cdot \left( t_{slab} - \frac{(t_{slab} - c)}{2} \right) = 163.038 \text{ kN} \cdot \text{m}$$

## Flexural Analysis of Steel Reinforced Decks: Steel 1, Steel 2

**Scope:** Analyze the Flexural Capacity of the Fiber Decks

**Calculated by:** Jared McRory

### Assumptions and Analysis Criteria:

Slab Thickness:  $t_{slab} := 203 \text{ mm}$   $c_c := 38.1 \text{ mm}$  (Clear Cover)

Width of Slab:  $b_{slab} := 1219 \text{ mm}$

Reinforcement:  $S_{bar} := 152 \text{ mm}$   $d_{bar} := 15.88 \text{ mm}$   $A_{bar} := \frac{\pi \cdot d_{bar}^2}{4} = 198.057 \text{ mm}^2$

$F_y := 490 \text{ MPa}$   $E_s := 221.2 \text{ GPa}$   $A_s := 8 \cdot A_{bar} = (1.584 \cdot 10^3) \text{ mm}^2$

Concrete:  $f'_c := 37 \text{ MPa}$

$$\beta_1 := 0.85 - \left( \frac{f'_c - 4000 \text{ psi}}{1000 \text{ psi}} \right) \cdot 0.05 = 0.782 \quad \epsilon_{cu} := 0.003$$

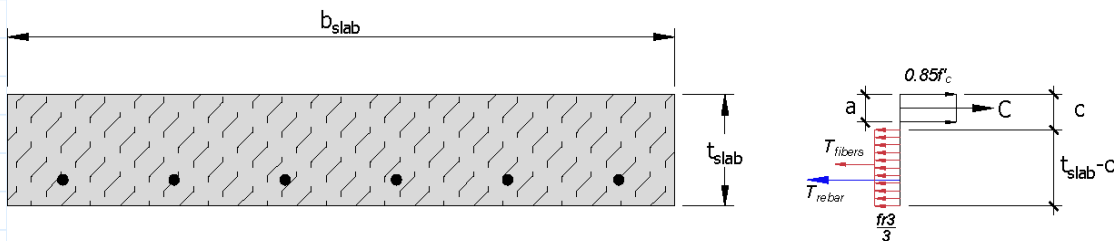

$$d := t_{slab} - \left( c_c + \frac{d_{bar}}{2} \right) = 156.96 \text{ mm}$$

$$a := \frac{A_s \cdot F_y}{0.85 \cdot \beta_1 \cdot b_{slab} \cdot f'_c} = 25.907 \text{ mm}$$

$$M_n := A_s \cdot F_y \cdot \left( d - \frac{a}{2} \right) = 111.804 \text{ kN} \cdot \text{m}$$

## Flexural Analysis of Steel Reinforced Decks: Steel 1 and 2 Million

**Scope:** Analyze the Flexural Capacity of the Fiber Decks

**Calculated by:** Jared McRory

### Assumptions and Analysis Criteria:

Slab Thickness:  $t_{slab} := 203 \text{ mm}$   $c_c := 38.1 \text{ mm}$  (Clear Cover)

Width of Slab:  $b_{slab} := 1219 \text{ mm}$

Reinforcement:  $S_{bar} := 152 \text{ mm}$   $d_{bar} := 15.88 \text{ mm}$   $A_{bar} := \frac{\pi \cdot d_{bar}^2}{4} = 198.057 \text{ mm}^2$

$F_y := 490 \text{ MPa}$   $E_s := 221.2 \text{ GPa}$   $A_s := 8 \cdot A_{bar} = (1.584 \cdot 10^3) \text{ mm}^2$

Concrete:  $f'_c := 37.5 \text{ MPa}$

$$\beta_1 := 0.85 - \left( \frac{f'_c - 4000 \text{ psi}}{1000 \text{ psi}} \right) \cdot 0.05 = 0.778 \quad \varepsilon_{cu} := 0.003$$

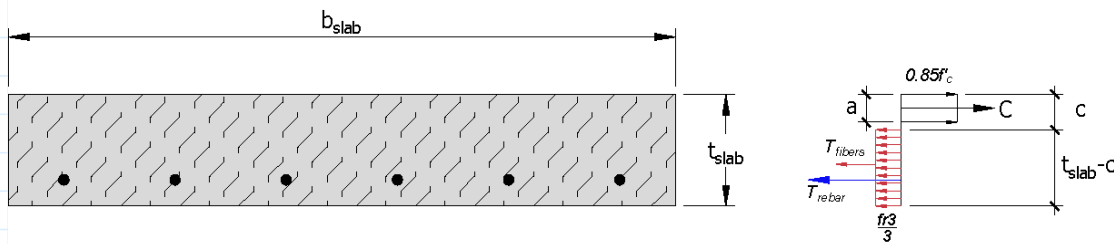

$$d := t_{slab} - \left( c_c + \frac{d_{bar}}{2} \right) = 156.96 \text{ mm}$$

$$a := \frac{A_s \cdot F_y}{0.85 \cdot \beta_1 \cdot b_{slab} \cdot f'_c} = 25.681 \text{ mm}$$

$$M_n := A_s \cdot F_y \cdot \left( d - \frac{a}{2} \right) = 111.892 \text{ kN} \cdot \text{m}$$

## Flexural Analysis of GFRP Reinforced Decks: GFRP 1 and GFRP 2

**Scope:** Analyze the Flexural Capacity of the Fiber Decks

**Calculated by:** Jared McRory

### Assumptions and Analysis Criteria:

Slab Thickness:  $t_{slab} := 203 \text{ mm}$   $c_c := 38.1 \text{ mm}$  (Clear Cover)

Width of Slab:  $b_{slab} := 1219 \text{ mm}$

Reinforcement:  $S_{bar} := 152 \text{ mm}$   $d_{bar} := 19.05 \text{ mm}$   $A_{bar} := \frac{\pi \cdot d_{bar}^2}{4} = 285.023 \text{ mm}^2$

$F_{ult} := 825 \text{ MPa}$   $E_f := 56.5 \text{ GPa}$   $A_f := 8 \cdot A_{bar} = (2.28 \cdot 10^3) \text{ mm}^2$

Concrete:  $f'_c := 46.5 \text{ MPa}$

$$\beta_1 := 0.85 - \left( \frac{f'_c - 4000 \text{ psi}}{1000 \text{ psi}} \right) \cdot 0.05 = 0.713 \quad \varepsilon_{cu} := 0.003$$

$$d_2 := t_{slab} - \left( c_c + \frac{d_{bar}}{2} \right) = 155.375 \text{ mm}$$

$$\rho_f := \frac{A_f}{b_{slab} \cdot d_2} = 0.012039 \quad \text{ACI 440.1R, Eq. 7.2.1a}$$

$$\rho_{fb} := 0.85 \cdot \beta_1 \cdot \frac{f'_c}{F_{ult}} \cdot \left( \frac{E_f \cdot 0.003}{E_f \cdot 0.003 + F_{ult}} \right) = 0.00582 \quad \text{ACI 440.1R, Eq. 7.2.1b}$$

$\rho_f > \rho_{fb}$  Therefore, Compression Controlled.

$$f_f := \sqrt{\frac{(E_f \cdot 0.003)^2}{4} + \frac{0.85 \cdot \beta_1 \cdot f'_c}{\rho_f} \cdot E_f \cdot 0.003} - 0.5 \cdot E_f \cdot 0.003 = 550.735 \text{ MPa} \quad \text{ACI 440.1R, Eq. 7.2.2d}$$

$$a := \frac{A_f \cdot f_f}{0.85 \cdot f'_c \cdot b_{slab}} = 26.064 \text{ mm} \quad \text{ACI 440.1R, Eq. 7.2.2b}$$

$$M_n := A_f \cdot f_f \cdot \left( d - \frac{a}{2} \right) = 180.742 \text{ kN} \cdot \text{m} \quad \text{ACI 440.1R, Eq. 7.2.2a}$$

## Flexural Analysis of GFRP Reinforced Decks: GFRP 1 and 2 million

**Scope:** Analyze the Flexural Capacity of the Fiber Decks

**Calculated by:** Jared McRory

### Assumptions and Analysis Criteria:

Slab Thickness:  $t_{slab} := 203 \text{ mm}$   $c_c := 38.1 \text{ mm}$  (Clear Cover)

Width of Slab:  $b_{slab} := 1219 \text{ mm}$

Reinforcement:  $S_{bar} := 152 \text{ mm}$   $d_{bar} := 19.05 \text{ mm}$   $A_{bar} := \frac{\pi \cdot d_{bar}^2}{4} = 285.023 \text{ mm}^2$

$F_{ult} := 825 \text{ MPa}$   $E_f := 56.5 \text{ GPa}$   $A_f := 8 \cdot A_{bar} = (2.28 \cdot 10^3) \text{ mm}^2$

Concrete:  $f'_c := 50.95 \text{ MPa}$

$$\beta_1 := 0.85 - \left( \frac{f'_c - 4000 \text{ psi}}{1000 \text{ psi}} \right) \cdot 0.05 = 0.681 \quad \varepsilon_{cu} := 0.003$$

$$d_2 := t_{slab} - \left( c_c + \frac{d_{bar}}{2} \right) = 155.375 \text{ mm}$$

$$\rho_f := \frac{A_f}{b_{slab} \cdot d_2} = 0.012039 \quad \text{ACI 440.1R, Eq. 7.2.1a}$$

$$\rho_{fb} := 0.85 \cdot \beta_1 \cdot \frac{f'_c}{F_{ult}} \cdot \left( \frac{E_f \cdot 0.003}{E_f \cdot 0.003 + F_{ult}} \right) = 0.00609 \quad \text{ACI 440.1R, Eq. 7.2.1b}$$

$\rho_f > \rho_{fb}$  Therefore, Compression Controlled.

$$f_f := \sqrt{\frac{(E_f \cdot 0.003)^2}{4} + \frac{0.85 \cdot \beta_1 \cdot f'_c}{\rho_f} \cdot E_f \cdot 0.003 - 0.5 \cdot E_f \cdot 0.003} = 564.96 \text{ MPa} \quad \text{ACI 440.1R, Eq. 7.2.2d}$$

$$a := \frac{A_f \cdot f_f}{0.85 \cdot f'_c \cdot b_{slab}} = 24.402 \text{ mm} \quad \text{ACI 440.1R, Eq. 7.2.2b}$$

$$M_n := A_f \cdot f_f \cdot \left( d - \frac{a}{2} \right) = 186.481 \text{ kN} \cdot \text{m} \quad \text{ACI 440.1R, Eq. 7.2.2a}$$
